1 **Assessment of prescribing in under-five pediatric outpatients**  
2 **in Nigeria: an application of the POPI (Pediatrics: Omission**  
3 **of Prescription and Inappropriate Prescription) tool**

4

5

6

7 Ufuoma Shalom Ahwinahwi<sup>1¶\*</sup> Valentine U Odili<sup>2¶</sup> Destiny Obiajulu Nwachukwu<sup>1</sup>

8

9

10 <sup>1</sup>Department of Clinical Pharmacy and Pharmacy Administration, Faculty of Pharmacy,  
11 Delta State University Abraka-Nigeria

12 <sup>2</sup>Department of Clinical Pharmacy and Pharmacy Practice, Faculty of Pharmacy, University of  
13 Benin, Benin-City, Nigeria

14 \*corresponding author

15 E-mail: [ushaloma@yahoo.com](mailto:ushaloma@yahoo.com); [suahwinahwi@delsu.edu.ng](mailto:suahwinahwi@delsu.edu.ng) (USA)

16

17 <sup>¶</sup>These authors contributed equally to the work

18

19

20

21

22 **Running title** : Effectiveness of the POPI tool in a Nigerian setting.

23

24

25

26 **Abstract**

27 **Background:** Ensuring the right drug for the right clinical condition in children under five  
28 years of age will dramatically reduce morbidity and mortality rates in developing countries  
29 where these values are alarmingly high. This study evaluated prescribing in children under the  
30 age of five attending pediatric outpatient clinics at three Central hospitals in Delta State, Nigeria,  
31 using the Pediatrics: Omission of Prescriptions and Inappropriate Prescription (POPI) tool.

32 **Methods:** This was a prospective descriptive study of prescriptions made to children from 0  
33 to 59 months who attended the clinics between August and November 2018. Prescriptions were  
34 evaluated using the POPI tool, occurrence of potentially inappropriate prescriptions and  
35 prescribing omissions were reported as percentages and inappropriate prescription types and  
36 prescription omissions were also reported as frequencies. Relationship between inappropriate  
37 prescriptions, omissions of prescriptions, and categorical variables of age group and sex,  $p < .05$   
38 were considered significant.

39 **Results:** A total of 1,327 prescriptions from the three centers were analyzed. There was a  
40 preponderance of infants ( $> 1$  month-12 months of age) in the study (43.0%) and a somewhat  
41 even gender distribution. Exactly 29.8% of all the prescriptions studied had at least one  
42 occurrence of inappropriate prescription. The use of H1 antagonists with sedative or atropine-  
43 like effects accounted for the majority of inappropriate prescriptions (49.5%), while the  
44 prescription of drinkable amoxicillin or other antibiotics in doses other than mg was the most  
45 frequent omission of prescription (97.2%). There was a significant relationship between the  
46 occurrence of inappropriate prescription and age group ( $p > 0.001$ ).

47 **Conclusion:** The occurrence of inappropriate prescriptions and omissions of prescriptions  
48 was high and effectively detected by the POPI tool. Measures should be taken to improve  
49 prescribing in order to reduce morbidity and mortality in children below five years.

50

51

52

53

54

55

56

## 57 **Introduction**

58 Medicines use in children as well as in other age groups should be rational ensuring the right  
59 drug for the right clinical condition. This should all the more be emphasized in developing  
60 countries where the morbidity and mortality rates are quite alarming for children especially those  
61 under five years of age. The pediatric population consist of a vulnerable group of individuals  
62 who could be exposed to untoward effects of drug because of the peculiarities associated with  
63 pharmacokinetic variations which occur due to their poorly developed organs[1] unlicensed  
64 medications and off-label drug use. Irrational prescribing can also result in the occurrence of  
65 adverse drug reactions which could in some cases lead to hospitalization. There is paucity of  
66 studies on rational drug prescribing in the pediatric population; but its importance is gaining  
67 increasing recognition [2]. Some tools have been developed to enhance appropriate prescribing in  
68 the adult population and their use have been well established. These include the Prescribing  
69 Optimally in Middle –aged Peoples’ Treatment (PROMPT) , Screening Tool for Older Persons  
70 Prescription(STOPP) / Screening Tool to Alert doctors to Right Treatment (START) and Beers  
71 Criteria[3-6]. The older population has had a number of these tools and have received attention  
72 because they are perceived to be very vulnerable because of the decline in the function of their  
73 organs and also the presence of comorbidities resulting in polypharmacy [7]. Until 2011, there  
74 was no developed Criteria or a tool for determining inappropriate prescribing specifically in  
75 children. Prot-Labathe and colleagues developed, Pediatric Omission of Prescription and  
76 Inappropriate Prescription (POPI)[8] and a modified version of the POPI which is POPI (UK)  
77 was also developed to suit the UK Clinical Practice[9]. Furthermore, the Potentially  
78 Inappropriate Prescribing in children (PIPc) indicators was developed in Ireland[10] and more  
79 recently the Key Potentially Inappropriate Drugs (KIDs) List developed by the Pediatric

80 Pharmacy Association of the United States[11]. The KIDs List was specifically developed as a  
81 tool to identify medication which have a high tendency to cause adverse drug reactions in  
82 children.

83 A number of studies has been done in Nigeria to detect inappropriate prescribing in the elderly  
84 using Beers criteria and STOPP/START criteria [12-14]. However, no study has been reported  
85 on the detection of inappropriate prescribing in children using prescribing indicators; our search  
86 has also revealed no such study in Africa.

87 The POPI tool was developed in France but was based on United States, United Kingdom and  
88 French guidelines [8]. It comprises 105 criteria with 80 inappropriate prescription (IP) and 25 as  
89 omissions of prescriptions (OP) on the list, although 104 was stated by the authors' report [8].  
90 These criteria were categorized majorly into Diverse Illnesses, Digestive Problems, ENT-  
91 Pulmonary Problems, Dermatological Problems and Neuro-psychiatric disorders. Potentially  
92 inappropriate prescriptions detect misprescribing and overprescribing while potentially  
93 inappropriate omissions detect underprescribing (omissions). The POPI had a consensus  
94 validation and has been validated with a retrospective study in a French Hospital and a  
95 community pharmacy setting

96 Potentially inappropriate prescriptions and prescription omissions were detected in a hospital as  
97 2.9% and 2.3% and the community pharmacy as 12.3% and 6.15% respectively [15]. The  
98 modified (UK) POPI has also been used in the English healthcare setting [9]. The applicability of  
99 the POPI tool outside of French setting has however not been ascertained as discovered from  
100 published research. It is worthy of note that in the process of writing up this study, the reports of  
101 an international validation of the POPI tool was published [16].

102 Nigeria is the most populous country in Africa, with over 40% of its population below 16 years  
103 of age with the mortality rate of children under age five is 138 per 1000 live births [17]. This  
104 population will derive utmost benefit from healthcare if medicines prescribed are appropriate  
105 because irrational prescribing can in fact worsen the state of health by undue exposure to  
106 adverse drug reactions. Delta State in Nigeria has put in place measures to improve on healthcare  
107 by providing free Medicare for children below age five since 2007. This laudable initiative can  
108 be even more beneficial when prescribing for this age group is appropriate.

109 This study aims to assess prescribing in under-fives using the POPI tool and specifically to  
110 determine incidence of inappropriate prescriptions and omissions of prescriptions using the  
111 POPI tool, as well as to determine the conditions mostly associated with inappropriate  
112 prescriptions and omissions in this age group.

113

## 114 **Methods**

### 115 **Study design**

116 This was a prospective cross-sectional study of prescriptions made out to pediatric patients aged  
117 between 0 and 5 years.

### 118 **Study setting**

119 This study was conducted in three Central hospitals purposively chosen from the three senatorial  
120 districts of the state namely, Central hospital Agbor, Central hospital Warri and Central hospital  
121 Ughelli between August 2018 and November 2018. The under-five pharmacy unit takes care of  
122 drug dispensing for children below the age of five who receive free medical care at the time of

123 the study. The study was conducted at the pharmacy departments where the prescriptions for  
124 pediatrics patients were filled.

125

## 126 **Study population**

127 The population studied were children aged 0- 59 months. All prescriptions for pediatric patients  
128 aged below five years dispensed at the out-patient pharmacies of the surveyed facilities during  
129 the period of data collection were included in the study. At the Central Hospital Warri 462  
130 prescriptions dispensed from 20<sup>th</sup> August – 20<sup>th</sup> November 2018. At the Central Hospital Agbor  
131 478 prescriptions were dispensed between the 1<sup>st</sup> of September 2018 and 30<sup>th</sup> October 2018 and  
132 a total of 387 prescriptions were dispensed at the, Central Hospital Ughelli between September  
133 24<sup>th</sup> – October 30<sup>th</sup> 2018.

134

## 135 **Data collection**

136 The prescriptions presented at the pharmacy for filling after consultation with doctors were  
137 assessed. Patient information which included age, gender, medical diagnosis, and drug  
138 prescribed were collected and additional information such as symptoms if available were  
139 extracted from prescription sheets and case files. Weight was not recorded for all patients and  
140 was therefore not included as data collected. Data was collected for all cases and recorded using  
141 a pro forma developed for data extraction. Prescriptions were assessed on individual basis  
142 irrespective of whether it was a repeat consultation or follow-up visit during the study period.

143 Assessment of prescriptions using the POPI tool: all extracted prescriptions were assessed using  
144 the POPI tool. Any omissions in the prescription were recorded on the pro-forma and all

145 inappropriate prescriptions were noted. At the end of the data extraction, all information  
146 collected were compared with the information contained on those itemized on the POPI tool. The  
147 POPI tool used contained 105 criteria as presented by the authors<sup>[8]</sup>. Some of these criteria which  
148 were either not applicable to this population or for which information where not available on the  
149 prescriptions were not analyzed as part of the study, these were

- 150 1. DEET: ‘30% (max) before 12 years old’ ; ‘50% (max) after 12 years old’ (Omission for  
151 mosquitoes)
- 152 2. IR3535:”20(Max) before 24 months old; ‘35% (max)after 24 months old. (Omission for  
153 mosquitoes).
- 154 3. Mosquito nets and clothes treated with pyrethroids(Omission for mosquitoes)
- 155 4. Failure to propose a whooping cough booster vaccine for adults who are likely to  
156 become parents in the coming months or years (Omission for Cough)
- 157 5. Cyproterone +ethinyl estradiol as a contraceptive to allow isotretinon per os  
158 (Inappropriate prescription for Acne vulgaris)
- 159 6. Contraception (provided with a logbook or diary) for menstruating girls taking  
160 isotretinoin (Omission for Acne vulgaris)

161

162 Total number of criteria analyzed for this study were 99 of the 105 criteria stated on the POPI  
163 tool (English Version)

## 164 **Data analysis**

165 Data retrieved were first analysed with the aid of the POPI tool to detect occurrence of  
166 Potentially Inappropriate Medicine and Omission of prescription which were recorded on the  
167 data collection form as inappropriate medicines and Omissions accordingly. Age of patients were  
168 categorized into age groups and reported in percentages. Occurrence of inappropriate medicines  
169 and omission of prescription were categorized and reported as either occurrence or non  
170 occurrence. Chi square tests was used to determine relationship between categorical variables  
171 (age group and gender) and occurrence of inappropriate prescribing and omission of prescription.  
172 Statistical Package for Social Sciences version 23 (IBM Corp Armonk, NY:) was used for  
173 analysis with statistical significance established at  $p < 0.05$ .

## 174 Results

175 A total of 1327 prescriptions were analysed in all three centres used for the study. Children  
176 within the age range of greater than one month to 12 months (infants) made up a higher  
177 percentage of hospital visits during the study (570 ,43.0%). And about half the population  
178 studied were female (665,50.1%). Table 1 shows details of demographics

179

180

181

182

183 Table 1. Demographics of study population

| Characteristic | Central Hospital, Warri<br>n=462 | Central Hospital, Agbor<br>n= 478 | Central Hospital, Ughelli<br>n=387 | Total<br>N=1327 |
|----------------|----------------------------------|-----------------------------------|------------------------------------|-----------------|
|                |                                  |                                   |                                    |                 |



|                  |                        | F (%)      | F (%)     | F (%)     | F (%)      |
|------------------|------------------------|------------|-----------|-----------|------------|
| <b>Age Group</b> | 0-1month               | 13(2.8)    | 27(5.6)   | 35(9)     | 75(5.7)    |
|                  | >1 month-12 months     | 250 (54.1) | 167(34.9) | 153(39.5) | 570 (43.0) |
|                  | >12 months-36 months   | 161(34.8)  | 203(42.5) | 156(40.3) | 520(39.2)  |
|                  | >36 months – 59 months | 38 (8.2)   | 81(16.9)  | 43(11.1)  | 162(12.2)  |
| <b>Gender</b>    | Female                 | 233(50.4)  | 230(48.1) | 202(52.2) | 665(50.1)  |
|                  | Male                   | 229 (49.6) | 248(51.9) | 185(47.8) | 662(49.9)  |

184

185

186

187 The occurrence of inappropriate prescription in all the prescriptions studied was 29.8%, with  
 188 Central hospital, Ughelli being the one with the highest prevalence among all centers.  
 189 Approximately 48% of all the prescriptions studied at this centre had at least one inappropriate  
 190 prescription. The overall prevalence of prescription omissions was 55.9% and Central Hospital  
 191 Agbor had up to 71% of prescription omissions. Table 2.

192

193

194 Table 2. Occurrence of Inappropriate prescription and Omission of Prescription at the study  
 195 centres

|  |  | Central Hospital Warri<br>N (%) | Central Hospital Agbor<br>N (%) | Central Hospital Ughelli<br>N (%) | Total N (%) |
|--|--|---------------------------------|---------------------------------|-----------------------------------|-------------|
|  |  |                                 |                                 |                                   |             |

|                            |               |            |            |            |            |
|----------------------------|---------------|------------|------------|------------|------------|
| Inappropriate prescription |               |            |            |            |            |
|                            | Occurrence    | 33 (7.1)   | 178 (37.2) | 185 (47.8) | 396 (29.8) |
|                            | No Occurrence | 429 (92.9) | 300 (62.8) | 202 (52.2) | 931 (70.2) |
| Omissions of prescription  |               |            |            |            |            |
|                            | Occurrence    | 225 (48.7) | 341 (71.3) | 159 (41.1) | 725 (54.6) |
|                            | No Occurrence | 237 (51.3) | 137 (28.7) | 228 (58.9) | 602 (45.4) |

196

197

198

199

200

201 Inappropriate prescriptions occurred across the age groups and gender in the different centres as

202 shown in Tables 3 and 4.

203

204

205

206 Table 3. Occurrence of inappropriate prescription across age groups

207

| Age group | Occurrence of Inappropriate Prescriptions |                  |                  |       | X <sup>2</sup> | p- |
|-----------|-------------------------------------------|------------------|------------------|-------|----------------|----|
|           | Central Hospital                          | Central Hospital | Central Hospital | Total |                |    |
|           |                                           |                  |                  |       |                |    |

|                           | Warri<br>F (%) | Agbor<br>F (%) | Ughelli<br>F (%) | F (%)     |       | value  |
|---------------------------|----------------|----------------|------------------|-----------|-------|--------|
| 0-1 month                 | 3(9.1)         | 8 (4.5)        | 9(4.9)           | 20(5.1)   | 19.66 | <0.001 |
| >1month -12<br>months     | 16(48.5)       | 88(49.4)       | 77(41.6)         | 181(45.7) |       |        |
| >12 months -<br>36 months | 14(42.4)       | 71(39.9)       | 84(45.4)         | 169(42.7) |       |        |
| >36months- 59<br>months   | 0(0)           | 11(6.2)        | 15(8.1)          | 26(6.6)   |       |        |
| Total                     | 33(100)        | 178(100)       | 185(100)         | 396(100)  |       |        |

208

209

210

211

212

213

214

215

216

217

218

219 Table 4. Occurrence of omission of prescription across age groups

220

| Age group | Occurrence Omission of prescription |                     |                     |       |                |    |
|-----------|-------------------------------------|---------------------|---------------------|-------|----------------|----|
|           | Central<br>Hospital                 | Central<br>Hospital | Central<br>Hospital | Total | X <sup>2</sup> | p- |

|                           | Warri<br>F (%) | Agbor<br>F (%) | Ughelli<br>F (%) | F (%)     |      | value |
|---------------------------|----------------|----------------|------------------|-----------|------|-------|
| 0-1 month                 | 5(2.2)         | 21(6.16)       | 16(10.1)         | 42(5.8)   | 2.96 | 0.398 |
| >1month -12<br>months     | 118(52.9)      | 125(36.6)      | 58(36.5)         | 301(41.7) |      |       |
| >12 months -<br>36 months | 82(36.1)       | 147(43.1)      | 68(42.8)         | 297(40.9) |      |       |
| >36months-<br>59 months   | 20(8.8)        | 48(14.1)       | 17(10.7)         | 85(11.7)  |      |       |
| Total                     | 225(100)       | 341(100)       | 159(100)         | 725(100)  |      |       |

221

222 The frequency of occurrence of inappropriate prescription was statistically significantly higher in  
 223 the >1 to 12 months age group (181;45.7%), followed by the >12 to 36 months age group  
 224 (169;42.7%) ( $p < 0.001$ ) as shown in table 3. Similarly, prescription omissions were more in the >1  
 225 to 12 months age group (301;41.7 %), followed by the >12- 36 months age group (297;40.9%),  
 226 however, the difference was not statistically significant. ( $p=0.398$ ) as shown in table 4. There  
 227 was no statistically significant difference in inappropriate prescription ( $p=0.905$ ) and omission of  
 228 prescription ( $p=0.07$ ) with regard to gender in the total population studied. Tables 5 and 6  
 229 respectively.

230

231

232 Table 5. Occurrence of inappropriate prescribing across gender

| Gender | Occurrence of Inappropriate prescriptions |                                   |                                |               |                |         |
|--------|-------------------------------------------|-----------------------------------|--------------------------------|---------------|----------------|---------|
|        | Central<br>Hospital Warri<br>F(%)         | Central<br>Hospital Agbor<br>F(%) | Central<br>Hospital<br>Ughelli | Total<br>F(%) | X <sup>2</sup> | p-value |

|        |          |          |          |           |       |       |
|--------|----------|----------|----------|-----------|-------|-------|
|        |          |          | F(%)     |           |       |       |
| Female | 18(54.6) | 80(44.9) | 96(51.9) | 194(49.0) | 0.025 | 0.905 |
| Male   | 15(45.4) | 98(45.1) | 89(49.1) | 202(51.0) |       |       |
| Total  | 33(100)  | 178(100) | 185(100) | 396(100)  |       |       |

233

234 Table.6 Occurrence of Omission of Prescription across gender

| Gender | Occurrence of Omission of Prescription |                             |                               |            |                |         |
|--------|----------------------------------------|-----------------------------|-------------------------------|------------|----------------|---------|
|        | Central Hospital Warri F(%)            | Central Hospital Agbor F(%) | Central Hospital Ughelli F(%) | Total F(%) | X <sup>2</sup> | p-value |
| Female | 103(45.8)                              | 165(48.4)                   | 82(51.6)                      | 352(48.6)  | 3.311          | 0.07    |
| Male   | 122(54.2)                              | 176(51.6)                   | 77(48.4)                      | 347(51.4)  |                |         |
| Total  | 225(100)                               | 341(100)                    | 159(100)                      | 725(100)   |                |         |

235

236

237 Overall, a total of 459 potentially inappropriate medicines were detected in the 396 prescriptions  
 238 encountered. Based on the systems in which they occurred, 302 of the 459 (65.8%) inappropriate  
 239 prescriptions were detected in prescriptions written for ENT/Pulmonary (respiratory) systems. Frequent  
 240 use of H1 antagonist for upper respiratory tract infections or cough associated with other conditions in  
 241 children less than 30 months old accounted for 49.5% (227/459) of all inappropriate prescriptions, with  
 242 133 of the total 227(58.6%) cases occurring at the Agbor centre. Fifty percent(231) of inappropriate  
 243 prescribing cases occurred in the Ughelli centre. Prescription of a medication other than paracetamol as  
 244 a first-line treatment for pain was predominant at the ughelli centre where 68 of 82 (82.9%)of such cases  
 245 occurred. Details of cases and types of inappropriate prescribing are shown in Table 7.

246 Table 7. Types of Inappropriate Prescription.

|                                | Type of Inappropriate Prescription                                                                                   | Central Hospital Warri F(%) | Central Hospital Agbor F(%) | Central Hospital Ughelli F(%) | Total F(%) |
|--------------------------------|----------------------------------------------------------------------------------------------------------------------|-----------------------------|-----------------------------|-------------------------------|------------|
| <b>DIVERSE ILLNESSES</b>       |                                                                                                                      |                             |                             |                               |            |
|                                | Prescription of a medication other than paracetamol as a first line treatment for pain and fever(except in migraine) | 11(2.4)                     | 3(0.7)                      | 68(14.8)                      | 82(17.9)   |
|                                | Prescription of two alternating antipyretics                                                                         | 0(0)                        | 0(0)                        | 4(0.9)                        | 4(0.9)     |
| <b>DIGESTIVE PROBLEMS</b>      |                                                                                                                      |                             |                             |                               |            |
|                                | Metoclopramide for nausea , vomiting or gastroesophagheal reflux                                                     | 0(0)                        | 9(2.0)                      | 28(6.1)                       | 37(8.1)    |
|                                | Domperidone for nausea , vomiting or gastroesophagheal reflux                                                        | 0(0)                        | 0(0)                        | 1(0.2)                        | 1(0.2)     |
|                                | Loperamide before 3 years old/in the case of invasive diarrhea                                                       | 0(0)                        | 1(0.2)                      | 0(0)                          | 1(0.2)     |
| <b>ENT /PULMONARY PROBLEMS</b> |                                                                                                                      |                             |                             |                               |            |
|                                | Mucolytic/ mucokinetic drugs or helcidine before 2 years of age for cough                                            | 3(0.7)                      | 29(6.3)                     | 2(0.4)                        | 34(7.4)    |
|                                | Promethazine for cough                                                                                               | 0(0)                        | 0(0)                        | 7(1.5)                        | 7(1.5)     |
|                                | Beta 2 agonists , corticosteroids to treat an infants first case of                                                  | 0(0)                        | 0(0)                        | 4(0.9)                        | 4(0.9)     |

|  |                                                                                                                                                                                                               |         |           |          |           |
|--|---------------------------------------------------------------------------------------------------------------------------------------------------------------------------------------------------------------|---------|-----------|----------|-----------|
|  | bronchiolitis                                                                                                                                                                                                 |         |           |          |           |
|  | H1 antagonist ,<br>cough suppressants<br>, mucolytic drugs<br>or ribavirin to treat<br>bronchiolitis                                                                                                          | 0(0)    | 1(0.2)    | 1(0.2)   | 2(0.4)    |
|  | An antibiotics<br>other than<br>amoxicillin as a<br>first-line treatment<br>for acute otitis<br>media, strep throat<br>or sinusitis<br>(provided the<br>patient is not<br>allergic to<br>amoxicillin)         | 0(0)    | 1(0.2)    | 3(0.7)   | 4(0.9)    |
|  | Corticosteroids to<br>treat suppurative<br>otitis media,<br>nasopharyngitis or<br>strep throat                                                                                                                | 0(0)    | 1(0.2)    | 0(0)     | 1(0.2)    |
|  | Nasal<br>decongestant                                                                                                                                                                                         | 4(0.9)  | 1(0.2)    | 13(2.8)  | 18(3.9)   |
|  | H1 antagonist with<br>sedative or<br>atropine-like<br>effects,or<br>camphors; inhalers,<br>nasal sprays or<br>suppository<br>containing menthol<br>(or any terpene<br>derivatives) before<br>30 months of age | 8(17.4) | 133(29.0) | 86(18.7) | 227(49.5) |
|  | Antibiotics to treat<br>otitis media with<br>effusion<br>(OME)except in<br>the case of hearing<br>loss or if OME<br>lasts more than 3<br>months                                                               | 0(0)    | 3(0.7)    | 0(0)     | 3(0.7)    |
|  | Ear drops in the<br>case of acute otitis<br>media                                                                                                                                                             | 0(0)    | 0(0)      | 1(0.2)   | 1(0.2)    |

|                                   |                                                                                                          |                  |                |                  |                 |
|-----------------------------------|----------------------------------------------------------------------------------------------------------|------------------|----------------|------------------|-----------------|
|                                   | Cough suppressants in case of Asthma                                                                     | 0(0)             | 1(0.2)         | 0(0.2)           | 1(0.2)          |
| <b>DERMATOLOGICAL PROBLEMS</b>    |                                                                                                          |                  |                |                  |                 |
| Scabies                           | Application of benzyl benzoate for periods longer than eight hours for infants and 12 hours for children | 5(1.1)           | 6(1.3)         | 7(1.5)           | 17(3.7)         |
| Ringworm                          | Treatment other than Griseofulvin for Microsporium                                                       | 0(0)             | 5(1.1)         | 0(0)             | 5(1.1)          |
| Impetigo                          | The combination of locally applied and orally applied antibiotics                                        | 3(0.7)           | 0(0)           | 0(0.7)           | 3(0.7)          |
|                                   | Any antibiotic other than mupirocin as a first-line (except in cases of hypersensitivity to mupirocin)   | 0(0)             | 0(0)           | 3(0.7)           | 3(0.7)          |
| <b>NEUROPSYCHIATRIC DISORDERS</b> |                                                                                                          |                  |                |                  |                 |
|                                   | Cyproheptadine for Anorexia                                                                              | 0(0)             | 0(0)           | 3(0.7)           | 3(0.7)          |
| <b>Total</b>                      |                                                                                                          | <b>194(42.3)</b> | <b>34(7.4)</b> | <b>231(50.3)</b> | <b>459(100)</b> |

247

248 A total of 737 omissions of prescriptions occurred in this study, with prescriptions of drinkable  
 249 amoxicillin and other antibiotics in doses other than in milligrams per ml accounting 716(  
 250 97.2%) of total omission, this omission of prescription occurred more in Central hospital, Agbor  
 251 with 45.2% of all prescriptions encountered at the center affected. Only 6 (0.8%) of all  
 252 omissions involved the prescription of oral rehydration salts in case of vomiting and diarrhea, all  
 253 of which were encountered at Central hospital, Agbor.

254 Table. 8. Types of omission of Prescription

|                | Type of Omission of Prescription | Central Hospital, Warri f(%) | Central hospital, Agbor f(%) | Central Hospital, Ughelli, f(%) | Total F(%) |
|----------------|----------------------------------|------------------------------|------------------------------|---------------------------------|------------|
| <b>DIVERSE</b> |                                  |                              |                              |                                 |            |



| ILLNESSES |                                                                                                           |           |           |           |            |
|-----------|-----------------------------------------------------------------------------------------------------------|-----------|-----------|-----------|------------|
|           | Asthma inhaler for children                                                                               | 0(0)      | 2(0.3)    | 0(0)      | 2(0.3)     |
|           | Oral rehydration solution during diarrhea and vomiting                                                    | 0(0)      | 6(0.8)    | 0(0)      | 6(0.8)     |
|           | Doses in mg for drinkable solution of antibiotics in varying concentration                                | 228(30.9) | 333(45.2) | 155(21.0) | 716 (97.2) |
|           | Decontamination of households linen and clothes and treatment of other family members in cases of scabies | 0(0)      | 4(0.5)    | 5(0.7)    | 9(1.2)     |
|           | Tropical treatment combined with oral treatment for microsporium                                          | 1(0.1)    | 2(0.3)    | 1(0.1)    | 4(0.5)     |
| Total     |                                                                                                           | 229(31.1) | 347(47.1) | 161(21.9) | 737(100)   |

255

256

## 257 Discussion

258 This study assessed inappropriate prescription and omissions of prescription in ambulatory  
 259 pediatric population in Delta state. The particularly high mortality of this age group in Nigeria  
 260 and vulnerability of under-fives made this of much interest. Our study revealed a high prevalence  
 261 of potentially inappropriate medicines (PIMs) and potentially prescribing omissions (PPOs) in  
 262 the pediatric population studied as detected by the POPI tool.

263 Over a quarter of the prescriptions in our study had at least one inappropriate medicine and more  
 264 than half had at least an omission of prescription. This is particularly higher than detected in a  
 265 French Hospital where 2.9% had an inappropriate prescription and 2.7% had an omission of  
 266 prescription [15]. A similar study done in the UK with a modified POPI tool had 32 out of a total  
 267 of 400 prescriptions having either inappropriate prescriptions or omission of prescription [9].

268 However, a high prevalence of inappropriate prescription of 26.4% was detected in a French  
269 community pharmacy setting which stock medicines like cough suppressants, domperidone,  
270 Rhinotrophyl, which are usually not available in their hospital setting <sup>[15]</sup>; this finding is  
271 comparable to the values obtained from the hospital setting in this study. Similarly, some items  
272 such as menthol crystals for inhalation and nasal decongestants were unavailable in the hospitals  
273 studied and patients' caregivers were asked to get these from nearby community pharmacy  
274 outlets. Using the PIPc indicators, an overall prevalence of PIPc of 3.5% (95% CI 3.5 to 3.6%)  
275 and 11.5% (95% CI 11.4% to 11.7%) by commission and omission respectively among children  
276 under 16 years of age across Ireland was detected <sup>[18]</sup>. Varying prevalence of inappropriate  
277 prescribing have been reported in other age groups. The overall prevalence of PIP among middle  
278 –aged persons using the PROMPT (Prescribing Optimally in Middle-aged People's Treatments)  
279 criteria was 42.9% <sup>[3]</sup> and 21.1%(95% CI 21.0-21.2) in the Republic of Ireland and Northern  
280 Ireland respectively. The prevalence of PIP in the Republic of Ireland was much higher than that  
281 detected by POPI in the current study while that in Northern Ireland was somewhat lower. A  
282 higher prevalence of PIPs was detected in our study when compared with other previous studies  
283 among the elderly detected by the STOPP/START criteria where a total of 12.9% and 7% of  
284 omission was found among the elderly in an Indian population<sup>[19]</sup>. A comparative study of  
285 inappropriate prescribing in the elderly using the 2015 American Geriatric Society updated Beers  
286 criteria revealed 35.2% and 29.6% in Nigerian and South African participants respectively (Saka  
287 et al,2019). Studies conducted in Nigeria among the elderly has shown a range of PIPs to be  
288 15.7-55.1% using the Beers and STOPP Criteria <sup>[20]</sup> <sup>[12]</sup> <sup>[13]</sup> <sup>[14]</sup> and Potential Prescribing  
289 Omissions were detected in 4.4% of patient prescriptions <sup>[21]</sup>. Inappropriate prescribing in

290 children detected with the aid of prescribing tools in Nigeria has not been reported as revealed  
291 from search of literature.

292 Other tools for detecting irrational prescribing in the adult population has been used in more  
293 frequent studies with geriatric patients being more in focus. This tools are however not similar as  
294 the prevalent disease conditions in both populations are different. Whereas the elderly has  
295 cardiovascular and nervous system conditions being more prevalent <sup>[4]</sup> children present more  
296 with respiratory and gastrointestinal conditions.

297 Frequent use of H1 antagonists for upper respiratory tract infections or cough associated with  
298 other conditions in children less than 30months old accounted for the most encountered  
299 inappropriate prescriptions while prescription of amoxicillin or other antibiotics in doses other  
300 than in milligrams accounted for the most encountered omission of prescription.  
301 The use of H1 antagonist is generally discouraged in young children because of the tendency to  
302 cause sedation, dizziness and incoordination in overdose. A New Zealander publication states  
303 that sedating antihistamines are contraindicated for all indications in children less than 2 years of  
304 age and for cough and colds in children less than 6years of age. (New Zealand Medicines and  
305 Medical Devices Authority, 2013). Also, there has not been any evidence found to support the  
306 use of sedating antihistamines in treating the symptoms of common colds in children <sup>[22]</sup>

307 Mucolytic and mucokinetic cough syrups or helcidine in children below the age of 2 years were  
308 frequently prescribed especially at Central Hospital, Agbor,

309 It was commonly observed in this study that oral amoxicillin and other antibiotics were  
310 prescribed in doses other than in mg as this was also the major omission in the French study. The

311 need to specify doses in milligrams cannot be overemphasized as most of these antibiotics are  
312 formulated in more than one concentration when reconstituted.

313 Metoclopramide was commonly used in one particular study centre to control vomiting in the  
314 study, it is was however not recommended by the POPI tool due to its tendency to cause  
315 extrapyramidal side effects such as tardive dyskinesia and sedation although studies have shown  
316 that these are reversible and do not have long term effects <sup>[23]</sup>.

317 The prescription of a medication other than paracetamol for pain and fever was mostly  
318 encountered at Central Hospital Ughelli with ibuprofen being frequently prescribed, a few  
319 occurrences of this inappropriate prescription was also observed at the other study centres.

320 Although malaria, a common disease condition in children of this age group particularly in the  
321 tropics was not included on the POPI tool, control for mosquito which is the vector causing  
322 malaria was however among the listed criteria, this item was however not included in the  
323 implementation of the use of the POPI because methods for eradication of mosquitoes are a  
324 general public health concern and concerted efforts such as the provision of insecticide treated  
325 nets are already provided for by the government and DEET and IR3535 are not available for  
326 prescribing in our hospitals. Hence assessing the prescriptions for these criteria was needless as  
327 they are not always documented on the prescription sheets.

328 The “prescription of an antibiotic other than amoxicillin as a first-line for acute otitis media,  
329 strep throat or sinusitis (provided the patient is not allergic to amoxicillin)” is a criterion which  
330 was not effectively assessed as most of the respiratory conditions were not described. Antibiotics  
331 were frequently prescribed in the prescriptions studied with amoxicillin occurring as first-line in

332 only 179 of the total of 746 prescriptions on respiratory infections for which antibiotics were  
333 prescribed.

334 The prescription of Oral Rehydration Salts (ORS) for children with symptoms of nausea and  
335 vomiting and also for diarrhea is highly commendable in this population. This contrasts the  
336 findings in the French study where this was a major PPO. In our study, many prescriptions with  
337 malaria and gastroenteritis also had oral rehydration salts prescribed with only a few cases of  
338 omissions.

339 The PIMs were more prevalent in diseases of the ENT/ Pulmonary problems categories with  
340 respiratory tract infections commonly diagnosed either alone or comorbid with other conditions  
341 giving a total of 304 out of the total 458 (66.4%) PIMs detected in the study. This high  
342 occurrence of PIMs is somewhat comparable to the pioneer study conducted in a French hospital  
343 setting where 472 of 541 (87.2%) PIMs detected were from prescriptions of ENT/Pulmonary  
344 disorders. This is more likely to occur due to the high prevalence of such conditions in the  
345 pediatric population which was also evidenced in the French hospital study where 45.2% of all  
346 prescriptions had ENT/Pulmonary disorders as pathology. This of course is not comparable in  
347 older populations because of the difference in the variations in the pathologies commonly  
348 associated in these groups. Notably, many of the prescriptions with malaria as diagnosis also had  
349 a high frequency of symptoms of cough and other respiratory symptoms.

350 The use of antibiotics was common in the prescriptions studied, and in a number of these  
351 prescriptions the rationale for their use could not be ascertained. Aside the common occurrence  
352 in prescriptions for respiratory tract infections, antibiotics were also commonly prescribed in  
353 prescriptions having malaria as the only pathology and in other gastrointestinal /digestive

354 conditions. In majority of these cases, prescription of antibiotics were in doses other than mg /ml  
355 which could be misleading as most of these antibiotics are available in more than one  
356 concentration.

357 The use of nasal decongestants was also observed in all the centres with Central  
358 Hospital,Ughelli having a higher frequency of occurrence, oral decongestants were not  
359 prescribed as they are often in combination with mucolytic/ mucokinetic cough mixtures.

360 An instance of the use of domperidone prescribed for dyspepsia also occurred in the study, this  
361 is a PIM included in the POPI tool. It is associated with Q-T interval prolongation.

362 A few instances were also observed where promethazine was prescribed for respiratory tract  
363 infections either occurring alone or with malaria.

364 The application of benzyl benzoate for periods longer than eight hours for infants in the  
365 treatment of scabies was also detected in our study. This criterion though not included in a newer  
366 version of POPI used in the French retrospective study is very much relevant in our study setting.

367 There was a significant relationship between the occurrence of PIM and age group however this  
368 was not so between the occurrence of PPO and age group. Prescription of inappropriate  
369 medicines were more in children between 1 month and 12 months than in those greater than 1  
370 year and up to 3 years old. This could have resulted from the observation that these age groups  
371 present more at the hospitals compared with the neonates (Birth – 1 month) and young children (  
372 > 3years - 5 years). Although, the French retrospective study covered a wider age of children (0-  
373 18 years), it reported that children between 0-12 years had a higher risk of presenting with a PIM  
374 and no PIM was detected in neonates <sup>[15]</sup>. Also gender was neither significantly associated with  
375 PIM and PPO as both gender were evenly distributed in the two cases.

## 376 . **Conclusion**

377 The POPI tool was effective in detecting inappropriate prescribing in an under-five ambulatory  
378 pediatric population in Nigeria. High incidence of potentially inappropriate medicines and  
379 potentially prescription omissions were detected. Inappropriate prescriptions occurred more with  
380 prescriptions for ENT/Pulmonary conditions while doses in milligram for drinkable solutions of  
381 amoxicillin and other antibiotics was the most frequent occurring omissions of prescription.  
382 There was a significant relationship between the occurrence of PIM and age group.

383

## 384 **Supporting information**

385 S1 Table: Dataset for Agbor Study Centre

386 S2 Table: Dataset for Warri study centre

387 S3 Table: Dataset for Ughelli Study centre

388

389

## 390 **REFERENCES**

- 391 1. Bartelink LH, Rademaker CM, Schobben AF; van den Anker JN. 2006.Guidelines on  
392 pediatric dosing on the basis of development physiology and pharmacokinetic considerations.  
393 Clin Pharmacokinet ,2006 45, 1077-1097
- 394 2. Choonara I.2013.Rational prescribing is important in all settings. Arch. Dis Child98; 720
- 395 3. Cooper JA, Moriarty F, Ryan C, Smith S, Bennett K, Fahey T, Wallace E , Cahir C, Williams  
396 D, Teeling M, Hughes CH.Potentilayy inappropriate prescribing in two populations ddiffering

- 397 in socio-economic profiles: a cross-sectional database study using the PROMPT criteria. *Eur J*  
398 *Clin Pharmacol*(2016)72:583-591
- 399 4. Gallagher P, Yan C, Byrne S, Kennedy J, O'Mahony D. STOPP (Screening Tool of Person'  
400 Prescriptions) and START (Screening Tool to Alert Doctors to Right Treatment) . 2008.  
401 Consensus validation. *Int J of Clin Pharm Ther*:46 72-83
- 402 5. Beers MH, Ouslander JG, Rollinger I, Reuben DB, Brooks J, Beck JC. Explicit criteria for  
403 determining inappropriate medication use in nursing home residents. *UCLA Division of*  
404 *Geriatric Medicine. Arch Intern Med.* 1991 Sep;151(9):1825-32. PMID: 1888249.
- 405 6. By the American Geriatrics Society 2015 Beers Criteria Update Expert Panel. American  
406 Geriatrics Society 2015 Updated Beers Criteria for Potentially Inappropriate Medication Use in  
407 Older Adults. *J Am Geriatr Soc.* 2015 Nov;63(11):2227-46. doi: 10.1111/jgs.13702. Epub 2015  
408 Oct 8. PMID: 26446832.
- 409 7. Spinewine A; Schmader KE, Barber N, Hughes C, Lapane KL; Swne C, Hanlon JT. 2007  
410 Appropriate prescribing in elderly people: how well can it be measured and optimized? *Lancet*  
411 ,370; 170-184
- 412 8. Prot-Labarthe S, Weil T, Angoulvant F, Boukedi R, Alberto C, Bourdon o.  
413 POPI(Pediatrics;Omission of Prescriptions and Inappropriate Prescriptions): Development of a  
414 tool to Identify Inappropriate Prescribing. *PLOS ONE* June 2014, volume 9 issue 6
- 415
- 416 9. Corrick F, Conroy S, Sammons H, Choonara I. Paediatric Rational Prescribing: A systematic  
417 Review of Assessment Tools. *International Journal of Environmental Research and Public*  
418 *Health* 2020.17.1473
- 419 10. Barry E, O'Brien K, Moriarty F, Cooper J, Redmond P, Hughes CM, Bennet K, Fahey T,  
420 Smith SM. The PIPc Project Steering group. PIPc study: development of indicators of potentially  
421 inappropriate prescribing in children (PIPc) in primary care using a modified Delphi technique ,  
422 *BMJ Open* 2016;6:e012079, doi:10.1136/bmjopen-2016-012079
- 423 11. Meyers RS, Thackray J, Matson KL, McPherson C, Lubsch L, Hellinga RC, Hoff DS. Key  
424 Potentially Inappropriate Drugs in Pediatrics: The KIDs List. *J Pediatr Pharmacol Ther.*  
425 2020;25(3):175-191. doi: 10.5863/1551-6776-25.3.175. PMID: 32265601; PMCID:  
426 PMC7134587.
- 427 12. Fadare JO, Agboola SM, Opeke OA, Alabi RA. Prescription pattern and prevalence of  
428 inappropriate medications among elderly patients in a Nigerian rural tertiary hospital.  
429 *Therapeutics and Clinical Risk Management* 2013;9,115-120
- 430 13. Fadare JO, Desalu OO, Obimankinde AM, Adeoti AO, Agoola SM. Prevalence of  
431 inappropriate medication prescription in the elderly in Nigeria; A comparison of Beers and  
432 STOPP criteria. *International Journal of Risk & Safety in Medicine* 27(2015)177-189



- 433 14. Akande-Sholabi W, Ajilore OC, Showande SJ, Adebuseye LA. Potential inappropriate  
434 prescribing among ambulatory elderly patients in a geriatric centre in southwestern Nigeria:  
435 Beers criteria versus STOPP/START criteria
- 436 15. Berthe-Aucejo A, Nguyen PKH, Angoulvant F, Balletre X, Albaret P, Weil T, boulkedid R,  
437 Bourdon O, Prot-Labathe S. Retrospective study of irrational prescribing in French paediatric  
438 hospital: prevalence of inappropriate prescriptions detected by Pediatrics: Omission of  
439 Prescription and Inappropriate prescription (POPI) in the emergency unit and ambulatory  
440 setting. *BMJ Open* 2019;9:e019186
- 441 16. Sadozai L, Sable S, Le Roux E, Coste P, Guillot C, Boizeau P, et al. (2020) International  
442 consensus validation of the POPI tool (Pediatrics: Omission of Prescriptions and Inappropriate  
443 prescriptions) to identify inappropriate prescribing in pediatrics. *PLoS ONE* 15(10): e0240105.  
444 doi:10.1371/journal.pone.0240105
- 445 17. National Population Commission(NPC)[Nigeria} and ICF 2019. Nigeria Demographic and  
446 Health Survey 2018. Abuja ,Nigeria and Rockville Maryland USA: NPC and ICF.
- 447 18. Barry E, Smith SM. Potentially Inappropriate Prescribing in Children. *J Pediatrics & Pediatr*  
448 *Med* 2018;2(5):1-4. Barry E, Moriarty F, Boland F , Bennett K, Smith SS. The PIPc Study-  
449 application of potentially inappropriate prescribing in children (PIPc) to a national prescribing  
450 database in Ireland: a cross-sectional prevalence study. *BMJ Open* 2018,8:e022876 ,  
451 doi:10.1136/bmjopen.2018-022876
- 452 19. Karandikar YS., Chaudhari SR, Dalal NP, Sharma M, Pandit VA. Inappropriate prescribing  
453 in the elderly: A comparison of two validated screening tools, *Journal of Clinical Gerontology*  
454 *and Geriatrics*, Volume 4, Issue 4, 2013,Pages 109-114
- 455 20. Eze UIH and Olowu AO. Prescribing Patterns and Inappropriate Use of Medications in Elderly  
456 Outpatients in a Tertiary Hospital in Nigeria. *Tropical Journal of Pharmaceutical Research* 2011; 10  
457 (1): 19-25
- 458 21. Akande-Sholabi W, Adebuseye LA, Olowookere OO. Potentially inappropriate medication  
459 use among older patients attending a geriatric centre in south-west Nigeria. *Pharmacy Practice*  
460 2018 Jul-sept 16(3) 1235
- 461 22. Medsafe (2009). Use of cough and cold medicines in children-New Advice. URL.  
462 [www.medsafe.gov.nz/coughandcold/infooct2009.asp](http://www.medsafe.gov.nz/coughandcold/infooct2009.asp) (assessed
- 463 23. Lau Moon Lin M, Robinson PD, Flank J, Sung L, Dupuis LL. The safety of Metoclopramide  
464 in Children: a systematic Review and Meta-Analysis, *Drug Saf.* 2016 ; 39(7) 675-87
